# Supplementary material
Source: PubMed Central journal article supplement (PMC8281022)
Supplement: jamapsychiatry-e211590-s001.pdf [file jamapsychiatry-e211590-s001.pdf]

## Supplementary Online Content

de Haan L, Sutterland AL, Schotborgh JV, Schirmbeck F, de Haan L. Association of *Toxoplasma gondii* seropositivity with cognitive function in healthy people: a systematic review and meta-analysis. *JAMA Psychiatry*. Published online July 14, 2021. doi:10.1001/jamapsychiatry.2021.1590

**eMethods 1.** Search Strategy

**eMethods 2.** Aggregation of Results

**eTable 1.** Aggregation of Tests in Cognitive Domains

**eTable 2.** Insufficient Reported Outcome Measures

**eTable 3.** Newcastle-Ottawa Scale Quality Assessment: Male and Female Participants Combined

**eTable 4.** Newcastle-Ottawa Scale Quality Assessment: Male and Female Participants Separated

**eTable 5.** Results From Meta-analyses and Subgroup Analysis

**eTable 6.** Results From Meta-regression Analyses

**eTable 7.** Meta-regression Analysis Dichotomized by Mean Age

**eFigure 1.** Forest Plot for Short-term Verbal Memory

**eFigure 2.** Forest Plot for Processing Speed Without Ene et al Study (Low Quality)

**eFigure 3.** Forest Plot for Executive Functioning Without Ene et al Study (Low Quality)

**eFigure 4.** Forest Plot for Executive Functioning Without Nimgaonkar et al Study

**eFigure 5.** Funnel Plot for Processing Speed

**eFigure 6.** Funnel Plot for Working Memory

**eFigure 7.** Funnel Plot for Short-term Verbal Memory

**eFigure 8.** Funnel Plot for Executive Functioning

**eFigure 9.** Meta-regression Analysis of Processing Speed: Mean Age

**eFigure 10.** Meta-regression Analysis of Processing Speed: Study Quality

**eFigure 11.** Meta-regression Analysis of Processing Speed: Seropositivity Cutoff

**eFigure 12.** Meta-regression Analysis of Working Memory: Mean Age

**eFigure 13.** Meta-regression Analysis of Working Memory: Seropositivity Cutoff

**eFigure 14.** Meta-regression Analysis of Short-term Verbal Memory: Mean Age

**eFigure 15.** Meta-regression Analysis of Executive Functioning: Mean Age

**eFigure 16.** Meta-regression Analysis of Executive Functioning: Study Quality

**eFigure 17.** Meta-regression Analysis of Executive Functioning: Seropositivity Cutoff

**eReferences**

This supplementary material has been provided by the authors to give readers additional information about their work.

© 2021 American Medical Association. All rights reserved.



## **eMethods 1. Search Strategy**

PubMed and MEDLINE (search date: June 7, 2019)

Search (toxoplasmosis OR toxoplasmic OR toxoplasma OR Neurotoxoplasmosis OR t gondii OR toxopl\*) AND (cognition OR cognitive OR neuropsychological OR neuropsychology OR psychomotor performances OR motor performance\*[tw] OR reaction time OR TMT OR CPT)

PsycINFO and EMBASE (search date: June 7, 2019)

(toxoplasmosis or toxoplasma gondii or toxoplasma).ab,sh,ti.

(toxoplasmosis or toxoplasmic or Neurotoxoplasmosis or t gondii or toxopl\*).ab,ti.

1 or 2 [t gondii sensitief]

(cognitive defect or cognition disorder or cognition or cognition disorder or neuropsychology or mental disorder or psychomotor performance? or psychophysiology or arousal or reaction time).ab,sh,ti.

(cognitive or motor performance\* or neuropsychological).ab,ti.

3 and 6

Web of Science (search date: June 7, 2019)

TS=(toxoplasmosis) OR TS=(toxoplasma gondii) OR TS=(toxoplasma)

TS=(cognition) OR TS=(cognitive) OR TS=(neuropsychology) OR TS=(reaction time) OR TS=(motor performance) OR TS=(neuropsychological) OR TS=(tmt) OR TS=(cpt) OR TS=(psychomotor performances)

#1 AND #2

## **eMethods 2. Aggregation of Results**

When aggregating outcome measures of cognitive tests into cognitive domains, we aimed to create categories as homogenous as possible (following the Strauss and Lezak compendium of neuropsychological assessments and the MATRICS Consensus Cognitive Battery initiative)<sup>1-3</sup>, while at the same time avoiding too many categories with small numbers, which could not be pooled for meta-analysis. We maintained a minimum of four studies required per meta-analysis.

eTable 1 shows which cognitive tests and corresponding measures within that test were categorized into a domain. The order of presentation in each table is also the order of preference when multiple tests from the same study were categorized in the same domain.

**eTable 1.** Aggregation of Tests in Cognitive Domains

**A**

|                                  | Test measure |
|----------------------------------|--------------|
| <b>Processing speed</b>          |              |
| Trail Making Test part A (TMT A) | seconds      |
| Simple Reaction Time Test (SRTT) | seconds      |
| GO reaction time test            | seconds      |

**B**

|                       | Test measure         |
|-----------------------|----------------------|
| <b>Working memory</b> |                      |
| Digit span forward    | total number correct |
| Digit span backward   | total number correct |
| Digit span scaled     | total number correct |

**C**

|                                             | Test measure             |
|---------------------------------------------|--------------------------|
| <b>Short term verbal memory</b>             |                          |
| Verbal Learning and Memory Test (VLMT)      | sum score trials 1-5     |
| Verbal Learning and Memory Test (VLMT)      | verbal learning score    |
| (Rey-) Auditory Verbal Learning Test (AVLT) | total short recall score |
| California Verbal Learning Test (CVLT)      | short term memory score  |
| Verbal Learning Test (VLT)                  | sum score                |

**D**

|                                     | Test measure          |
|-------------------------------------|-----------------------|
| <b>Executive functioning</b>        |                       |
| Trail Making Test part B (TMT B)    | seconds               |
| Verbal Fluency Test (VFT)           | total number of words |
| TMT B, VFT and clock drawing scaled | sum score             |

**eTable 2.** Insufficient Reported Outcome Measures

The following table shows an overview of outcome measures that were reported in insufficient studies to be pooled in a meta-analysis.

| <b>Domain</b>                               | <b>Test</b>                                      | <b>N studies</b> |
|---------------------------------------------|--------------------------------------------------|------------------|
| <b>Attention</b>                            | Continuous performance task II (CPT II Conners') | 1                |
|                                             | d2                                               | 1                |
| <b>Visual memory</b>                        | Wechsler memory scale (WMS) - family pictures    | 1                |
| <b>Visuospatial memory</b>                  | Brief visuospatial memory                        | 1                |
|                                             | Rey-osterrieth complex figure (ROCF)             | 1                |
| <b>Executive functioning - visuospatial</b> | Mental rotation task - mirrored figures          | 1                |
| <b>Associate learning</b>                   | WMS Associate learning                           | 1                |
| <b>Intelligence</b>                         | MWT-B                                            | 1                |
| <b>Motor ability</b>                        | Grooved pegboard test                            | 1                |
| <b>Verbal memory/ learning</b>              | Selective reminding test (SRT)                   | 1                |
|                                             | Wide range achievement test revised (WRAT-R)     | 1                |
|                                             | Serial digit learning (SDL)                      | 1                |
| <b>Overall cognition</b>                    | Global deficit score (GDS)                       | 1                |
|                                             | Cognitive failures questionnaire (CFQ)           | 1                |

**eTable 3.** Newcastle-Ottawa Scale Quality Assessment: Male and Female Participants Combined

| Study, year                                        | Selection             |                          |                          |                           | Comparability       | Exposure            |                   |                         | Total score (N/9) |
|----------------------------------------------------|-----------------------|--------------------------|--------------------------|---------------------------|---------------------|---------------------|-------------------|-------------------------|-------------------|
|                                                    | Case definition (N/1) | Representativeness (N/1) | Selection controls (N/1) | Definition controls (N/1) | Comparability (N/2) | Ascertainment (N/1) | Same method (N/1) | Non-response rate (N/1) |                   |
| Berrett 2017 <sup>4</sup>                          | 1                     | 1                        | 1                        | 1                         | 0                   | 1                   | 1                 | 0                       | 6                 |
| Cobia 2017 <sup>5</sup>                            | 1                     | 0                        | 1                        | 1                         | 0                   | 1                   | 1                 | 1                       | 6                 |
| El-Hadidy 2013 <sup>6</sup>                        | 1                     | 0                        | 1                        | 1                         | 0                   | 1                   | 1                 | 1                       | 6                 |
| Ene 2016 <sup>7</sup>                              | 1                     | 0                        | 0                        | 1                         | 0                   | 1                   | 1                 | 1                       | 5                 |
| <u>Gajewski 2014</u> <sup>8</sup>                  | 1                     | 0                        | 1                        | 1                         | 0                   | 1                   | 1                 | 1                       | 6                 |
| <u>Guenter 2012</u> <sup>9</sup>                   | 1                     | 0                        | 1                        | 1                         | 0                   | 1                   | 1                 | 1                       | 6                 |
| Hamdani 2017 <sup>10</sup>                         | 1                     | 0                        | 1                        | 1                         | 0                   | 1                   | 1                 | 0                       | 5                 |
| <u>Mendy 2015</u> <sup>11</sup><br><i>children</i> | 1                     | 1                        | 1                        | 1                         | 1                   | 1                   | 1                 | 0                       | 7                 |
| <u>Nimgaonkar 2016</u> <sup>12</sup>               | 1                     | 1                        | 1                        | 1                         | 2                   | 1                   | 1                 | 1                       | 9                 |
| <u>Novotna 2008</u> <sup>13</sup><br>1             | 1                     | 0                        | 1                        | 1                         | 0                   | 1                   | 1                 | 1                       | 6                 |
| <u>Novotna 2008</u> <sup>13</sup><br>2             | 1                     | 0                        | 1                        | 1                         | 0                   | 1                   | 1                 | 1                       | 6                 |
| <u>Novotna 2008</u> <sup>13</sup><br>3             | 1                     | 0                        | 1                        | 1                         | 2                   | 1                   | 1                 | 0                       | 7                 |
| Stock 2014 <sup>14</sup>                           | 1                     | 0                        | 1                        | 1                         | 2                   | 1                   | 1                 | 1                       | 8                 |
| Sugden 2016 <sup>15</sup>                          | 1                     | 1                        | 1                        | 1                         | 1                   | 1                   | 1                 | 0                       | 7                 |
| <u>Torniainen-Holm 2019</u> <sup>16</sup>          | 1                     | 1                        | 1                        | 1                         | 0                   | 1                   | 1                 | 0                       | 6                 |

**Legend:**

Underlined and in italic: See eTable 4: male and female separated

N/...: number out of ...

**eTable 4.** Newcastle-Ottawa Scale Quality Assessment: Male and Female Participants Separated

| Study, year                                        | Selection             |                          |                          |                           | Comparability       | Exposure            |                   |                         | Total score (N/9) |
|----------------------------------------------------|-----------------------|--------------------------|--------------------------|---------------------------|---------------------|---------------------|-------------------|-------------------------|-------------------|
|                                                    | Case definition (N/1) | Representativeness (N/1) | Selection controls (N/1) | Definition controls (N/1) | Comparability (N/2) | Ascertainment (N/1) | Same method (N/1) | Non-response rate (N/1) |                   |
| <i>Gajewski 2014</i> <sup>8</sup>                  | 1                     | 0                        | 1                        | 1                         | 1                   | 1                   | 1                 | 1                       | 7                 |
| <i>Guenter 2012</i> <sup>9</sup>                   | 1                     | 0                        | 1                        | 1                         | 1                   | 1                   | 1                 | 1                       | 7                 |
| <i>Mendy 2015</i> <sup>11</sup><br><i>children</i> | 1                     | 1                        | 1                        | 1                         | 2                   | 1                   | 1                 | 0                       | 8                 |
| <i>Nimgaonkar 2016</i> <sup>12</sup>               | 1                     | 1                        | 1                        | 1                         | 2                   | 1                   | 1                 | 1                       | 9                 |
| <i>Novotna 2008</i> <sup>13</sup><br><i>1</i>      | 1                     | 0                        | 1                        | 1                         | 1                   | 1                   | 1                 | 1                       | 7                 |
| <i>Novotna 2008</i> <sup>13</sup><br><i>2</i>      | 1                     | 0                        | 1                        | 1                         | 1                   | 1                   | 1                 | 1                       | 7                 |
| <i>Torniainen-Holm 2019</i> <sup>16</sup>          | 1                     | 1                        | 1                        | 1                         | 1                   | 1                   | 1                 | 0                       | 7                 |

**Legend:**

*Italic:* Changed relative to eTable 3

N/...: number out of ...



**eTable 5.** Results From Meta-analyses and Subgroup Analysis

**A**

| Cognitive domain                                                           | N studies | N participants | SMD   | Lower  | Upper | P-value | I <sup>2</sup> |
|----------------------------------------------------------------------------|-----------|----------------|-------|--------|-------|---------|----------------|
| <b>Processing speed</b>                                                    |           |                |       |        |       |         |                |
| Processing speed                                                           | 11        | 9495           | 0.122 | 0.054  | 0.190 | <.001   | 13.356         |
| *Processing speed: SRTT                                                    | 5         | 9105           | 0.119 | 0.038  | 0.199 | .004    | 35.523         |
| *Processing speed: TMT A                                                   | 4         | 303            | 0.003 | -0.241 | 0.247 | .98     | 0              |
| *Processing speed: healthy controls (instead of population representative) | 9         | 1258           | 0.068 | -0.050 | 0.186 | .26     | 0              |
| *Processing speed: male                                                    | 5         | 3247           | 0.182 | 0.093  | 0.272 | <.001   | 0              |
| *Processing speed: female                                                  | 5         | 3701           | 0.141 | 0.064  | 0.217 | <.001   | 0              |
| *Processing speed: without the study of Ene (low quality) Fig. S1          | 10        | 9444           | 0.126 | 0.067  | 0.185 | <.001   | 6.502          |

**B**

| Cognitive domain      | N studies | N participants | SMD   | Lower | Upper | P-value | I <sup>2</sup> |
|-----------------------|-----------|----------------|-------|-------|-------|---------|----------------|
| <b>Working memory</b> |           |                |       |       |       |         |                |
| Working memory        | 6         | 2951           | 0.162 | 0.061 | 0.262 | .002    | 0              |

**C**

| Cognitive domain                | N studies | N participants | SMD   | Lower | Upper | P-value | I <sup>2</sup> |
|---------------------------------|-----------|----------------|-------|-------|-------|---------|----------------|
| <b>Short term verbal memory</b> |           |                |       |       |       |         |                |
| Short term verbal memory        | 5         | 7352           | 0.179 | 0.087 | 0.270 | <.001   | 21.561         |

## D

| Cognitive domain                                                                                     | N studies | N participants | SMD   | Lower  | Upper | P-value | I <sup>2</sup> |
|------------------------------------------------------------------------------------------------------|-----------|----------------|-------|--------|-------|---------|----------------|
| <b>Executive functioning</b>                                                                         |           |                |       |        |       |         |                |
| Executive functioning                                                                                | 8         | 8413           | 0.146 | 0.012  | 0.279 | .03     | 63.475         |
| Executive functioning:<br>TMT B <sup>a</sup>                                                         | 5         | 1130           | 0.039 | -0.126 | 0.205 | .64     | 14.303         |
| Executive functioning:<br>healthy controls (instead<br>of population<br>representative) <sup>a</sup> | 6         | 1376           | 0.119 | 0.028  | 0.209 | .01     | 4.277          |
| Executive functioning:<br>male <sup>a</sup>                                                          | 4         | 3281           | 0.208 | 0.071  | 0.345 | .03     | 23.198         |
| Executive functioning:<br>female <sup>a</sup>                                                        | 4         | 4135           | 0.241 | 0.054  | 0.427 | .01     | 63.245         |
| Executive functioning:<br>without the study of Ene<br>(low quality) (fig. S2) <sup>a</sup>           | 7         | 8362           | 0.146 | 0.004  | 0.287 | .04     | 68.668         |
| Executive functioning:<br>without the study of<br>Nimgaonkar (fig. S3) <sup>a</sup>                  | 7         | 7431           | 0.105 | 0.032  | 0.177 | .005    | 6.059          |

Abbreviations: SMD = standardized mean difference; lower = lower limit of confidence interval; upper = upper limit of confidence interval; SRTT = simple reaction time test; TMT A = trail making test A; TMT B = trail making test B.

<sup>a</sup> subgroup or sensitivity analyses

**eTable 6.** Results From Meta-regression Analyses

| Covariate                       | N studies | Q                 | P-value | R <sup>2</sup> |
|---------------------------------|-----------|-------------------|---------|----------------|
| <b>Processing speed</b>         |           |                   |         |                |
| Mean age                        | 10        | 2.50              | .11     | 85%            |
| Study quality                   | 11        | 3.22              | .07     | 100%           |
| Seropositivity cut off          | 10        | 3.06              | .08     | 100%           |
| <b>Working memory</b>           |           |                   |         |                |
| Mean age                        | 6         | 0.52              | 0.47    | 0%             |
| Study quality                   | 6         | 0.04              | 0.84    | 0%             |
| Seropositivity cut off          | 5         | 1.35              | 0.25    | 0%             |
| <b>Short term verbal memory</b> |           |                   |         |                |
| Mean age                        | 5         | 0.40              | 0.53    | 0%             |
| Study quality                   | 5         | 0.72              | 0.40    | 0%             |
| <b>Executive functioning</b>    |           |                   |         |                |
| Mean age                        | 8         | 6.17 <sup>a</sup> | .01     | 81%            |
| Study quality                   | 8         | 3.27              | .07     | 42%            |
| Seropositivity cut off          | 6         | 1.78              | .18     | 37%            |

<sup>a</sup> significant effect

We did not run a meta-regression analysis of seropositivity cut off values in the short term memory domain because the studies that provided results measuring short term verbal memory either used a cut off value of 50 IU/ml, or cut off values were unknown.

**eTable 7.** Meta-regression Analysis Dichotomized by Mean Age

| Groups                        |                | Effect size and 95% confidence interval |                |          |             |             | Test of null (2-Tail) |         | Heterogeneity |        |         |           | Tau-squared |                |          |       |
|-------------------------------|----------------|-----------------------------------------|----------------|----------|-------------|-------------|-----------------------|---------|---------------|--------|---------|-----------|-------------|----------------|----------|-------|
| Group                         | Number Studies | Point estimate                          | Standard error | Variance | Lower limit | Upper limit | Z-value               | P-value | Q-value       | df (Q) | P-value | I-squared | Tau Squared | Standard Error | Variance | Tau   |
| <b>Fixed effect analysis</b>  |                |                                         |                |          |             |             |                       |         |               |        |         |           |             |                |          |       |
| <40                           | 4              | 0,035                                   | 0,067          | 0,005    | -0,096      | 0,167       | 0,524                 | 0,600   | 4,263         | 3      | 0,234   | 29,622    | 0,014       | 0,040          | 0,002    | 0,120 |
| >40                           | 4              | 0,176                                   | 0,028          | 0,001    | 0,121       | 0,231       | 6,273                 | 0,000   | 11,147        | 3      | 0,011   | 73,087    | 0,019       | 0,028          | 0,001    | 0,136 |
| Total within                  |                |                                         |                |          |             |             |                       |         | 15,410        | 6      | 0,017   |           |             |                |          |       |
| Total between                 |                |                                         |                |          |             |             |                       |         | 3,755         | 1      | 0,053   |           |             |                |          |       |
| Overall                       | 8              | 0,155                                   | 0,026          | 0,001    | 0,104       | 0,206       | 5,989                 | 0,000   | 19,165        | 7      | 0,008   | 63,475    | 0,016       | 0,018          | 0,000    | 0,126 |
| <b>Mixed effects analysis</b> |                |                                         |                |          |             |             |                       |         |               |        |         |           |             |                |          |       |
| <40                           | 4              | 0,040                                   | 0,105          | 0,011    | -0,166      | 0,246       | 0,380                 | 0,704   |               |        |         |           |             |                |          |       |
| >40                           | 4              | 0,215                                   | 0,093          | 0,009    | 0,032       | 0,398       | 2,306                 | 0,021   |               |        |         |           |             |                |          |       |
| Total between                 |                |                                         |                |          |             |             |                       |         | 1,551         | 1      | 0,213   |           |             |                |          |       |
| Overall                       | 8              | 0,138                                   | 0,070          | 0,005    | 0,001       | 0,275       | 1,978                 | 0,048   |               |        |         |           |             |                |          |       |

**eFigure 1.** Forest Plot for Short-term Verbal Memory

**T.gondii infection and Short Term Verbal Memory**

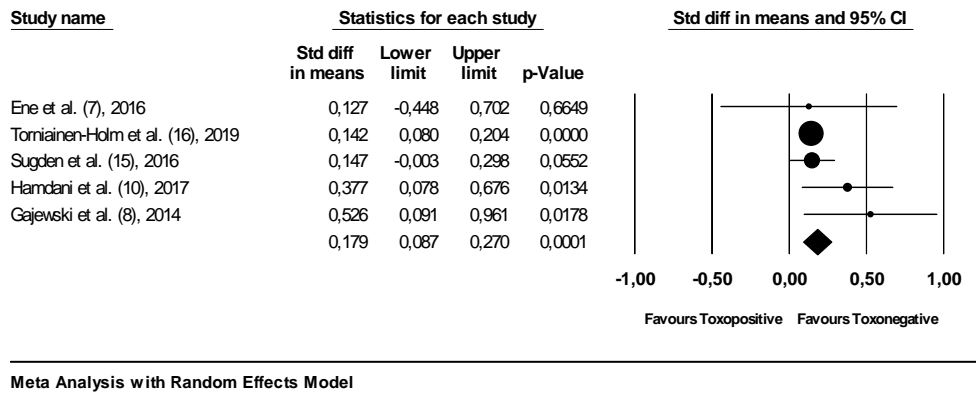

**eFigure 2.** Forest Plot for Processing Speed Without Ene et al<sup>7</sup> Study (Low Quality)

**T.gondii infection and Processing Speed (without Ene et al.)**

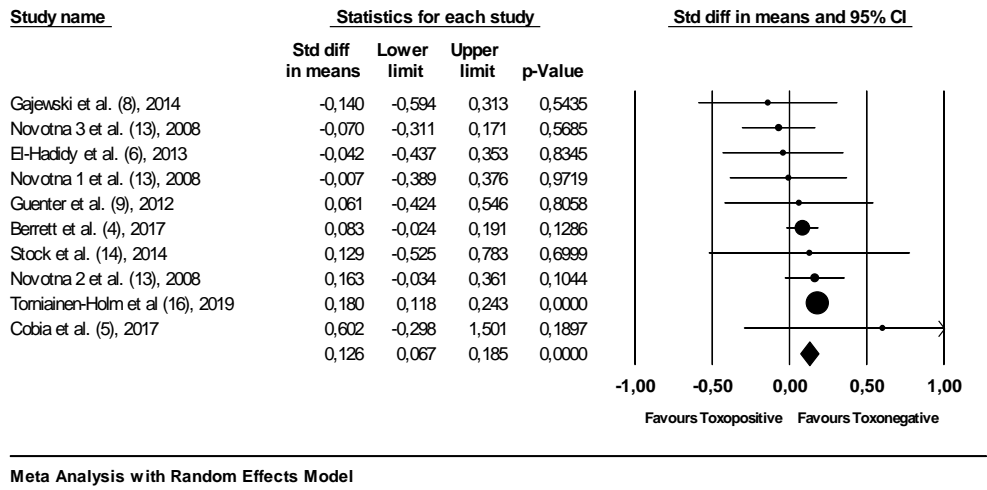

**eFigure 3.** Forest Plot for Executive Functioning Without Ene et al<sup>7</sup> Study (Low Quality)

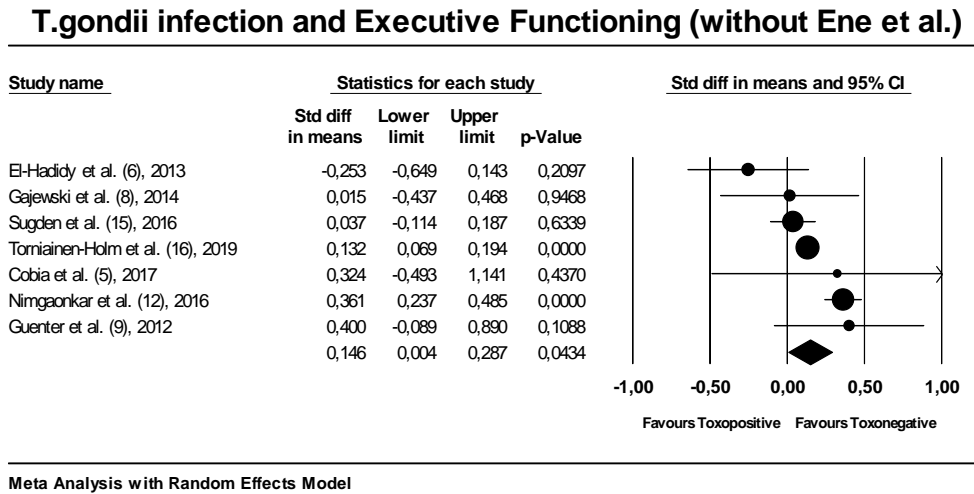

**eFigure 4.** Forest Plot for Executive Functioning Without Nimgaonkar et al<sup>12</sup> Study

**T.gondii infection and Executive Functioning (without Nimgaonkar et al.)**

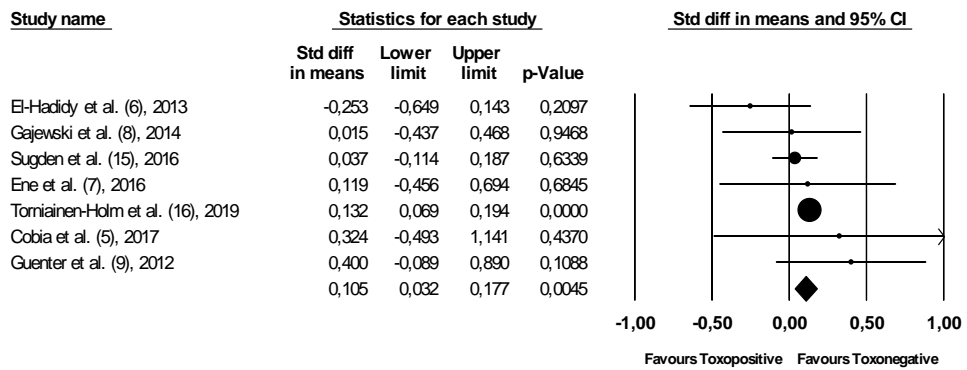

Meta Analysis with Random Effects Model



**eFigure 5.** Funnel Plot for Processing Speed

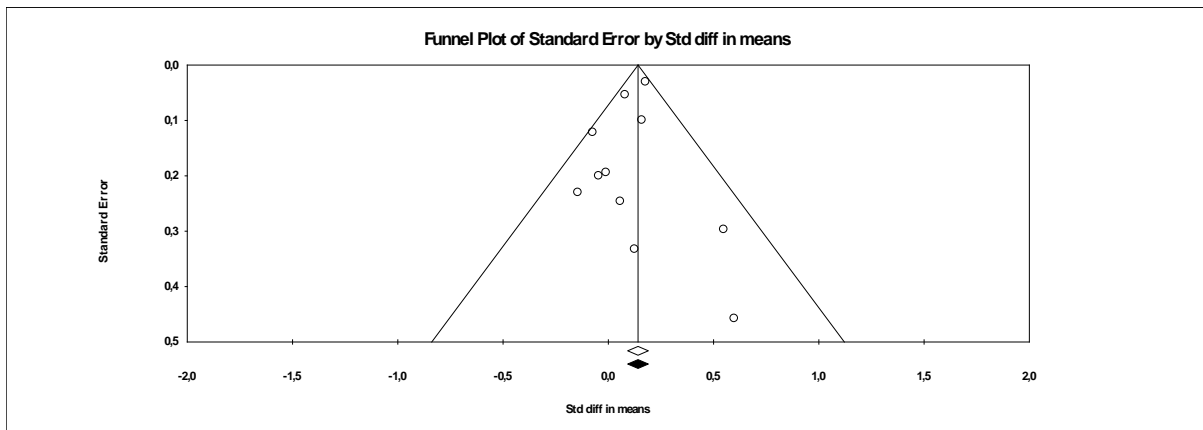

**eFigure 6.** Funnel Plot for Working Memory

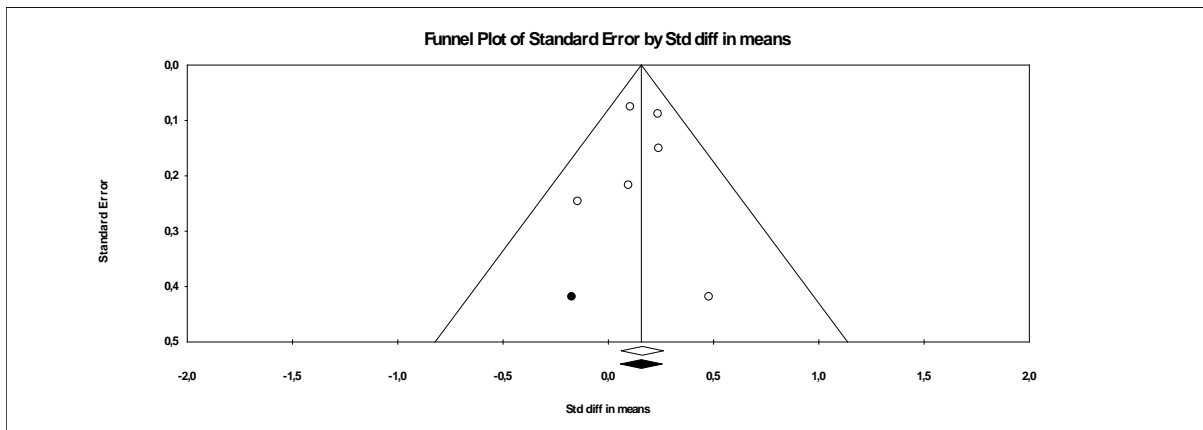

**eFigure 7.** Funnel Plot for Short-term Verbal Memory

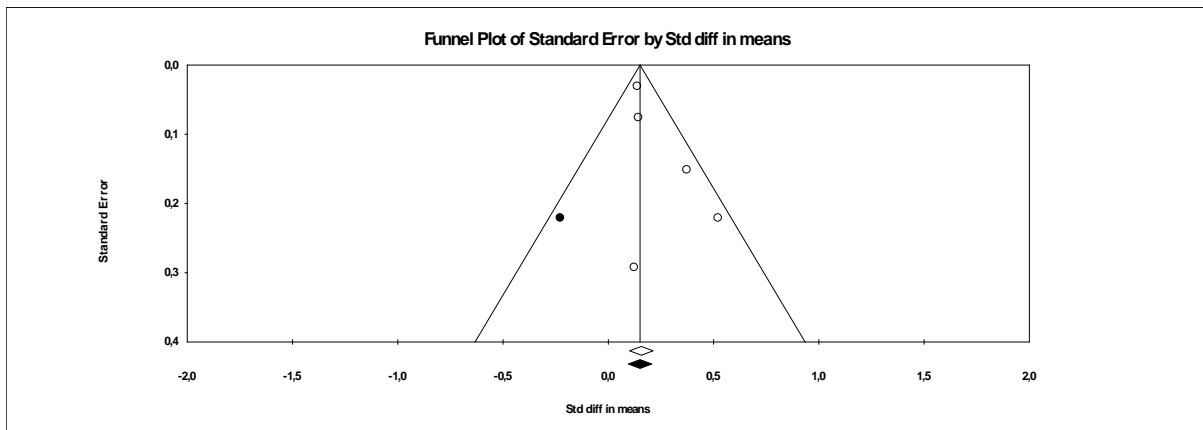

**eFigure 8.** Funnel Plot for Executive Functioning

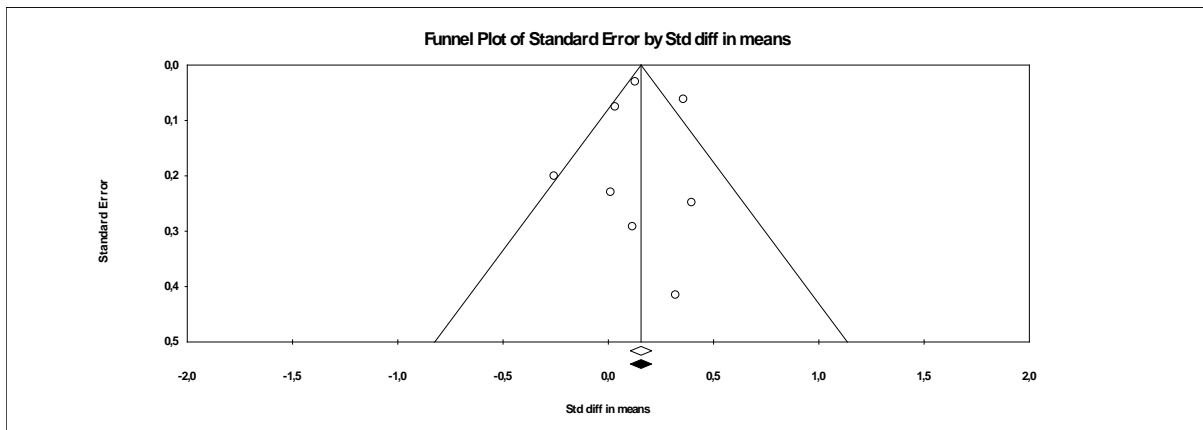

**eFigure 9.** Meta-regression Analysis of Processing Speed: Mean Age

**Regression of Std diff in means on Mean Age**

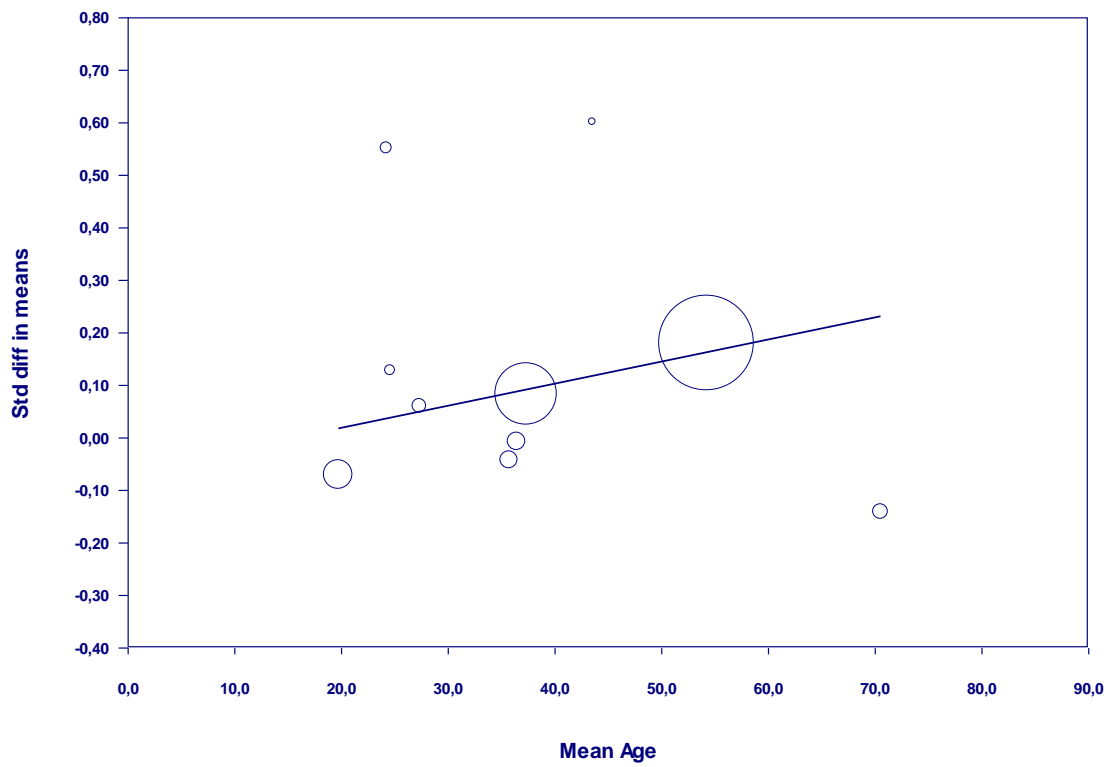

**eFigure 10.** Meta-regression Analysis of Processing Speed: Study Quality

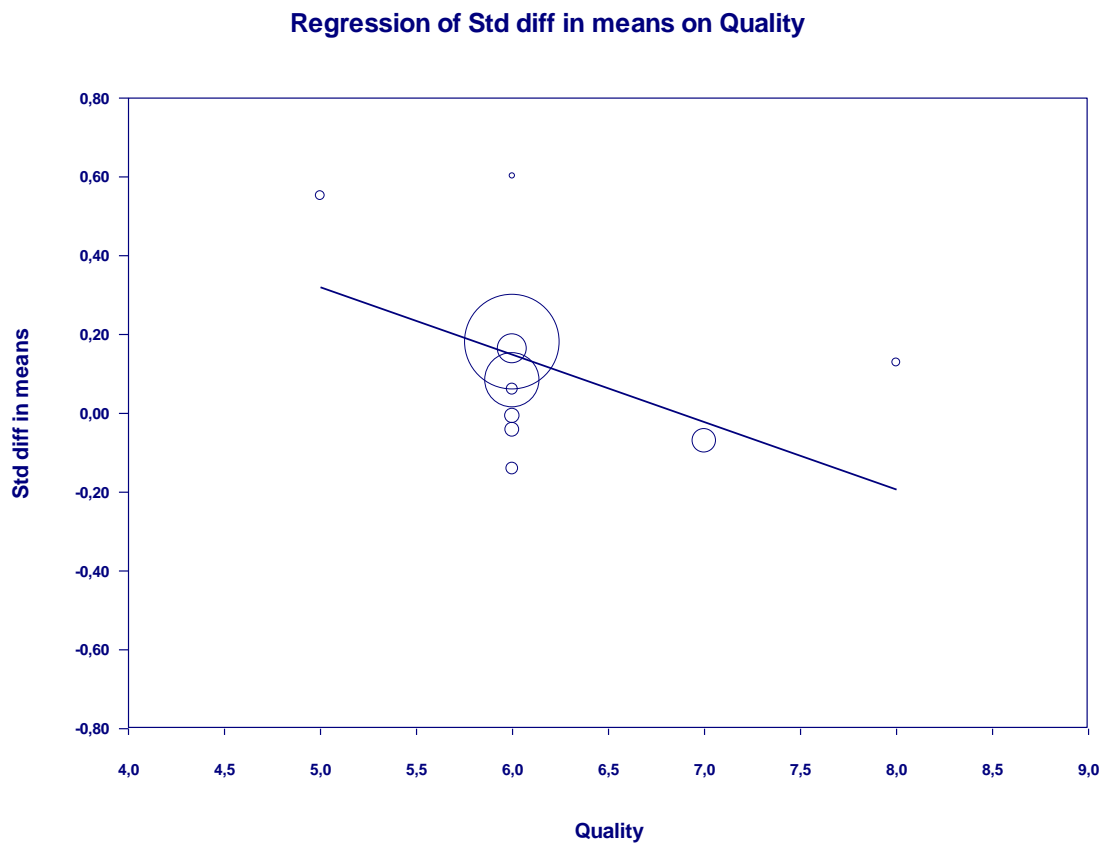

**eFigure 11.** Meta-regression Analysis of Processing Speed: Seropositivity Cutoff

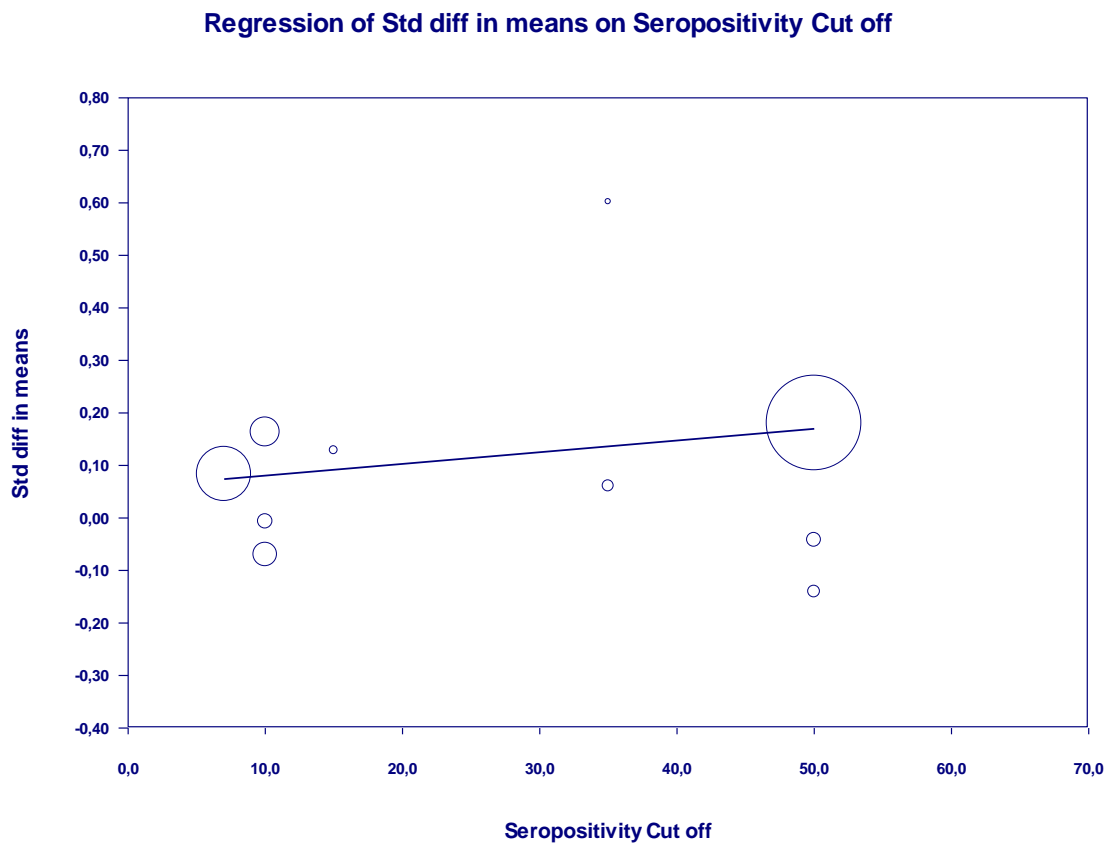

**eFigure 12.** Meta-regression Analysis of Working Memory: Mean Age

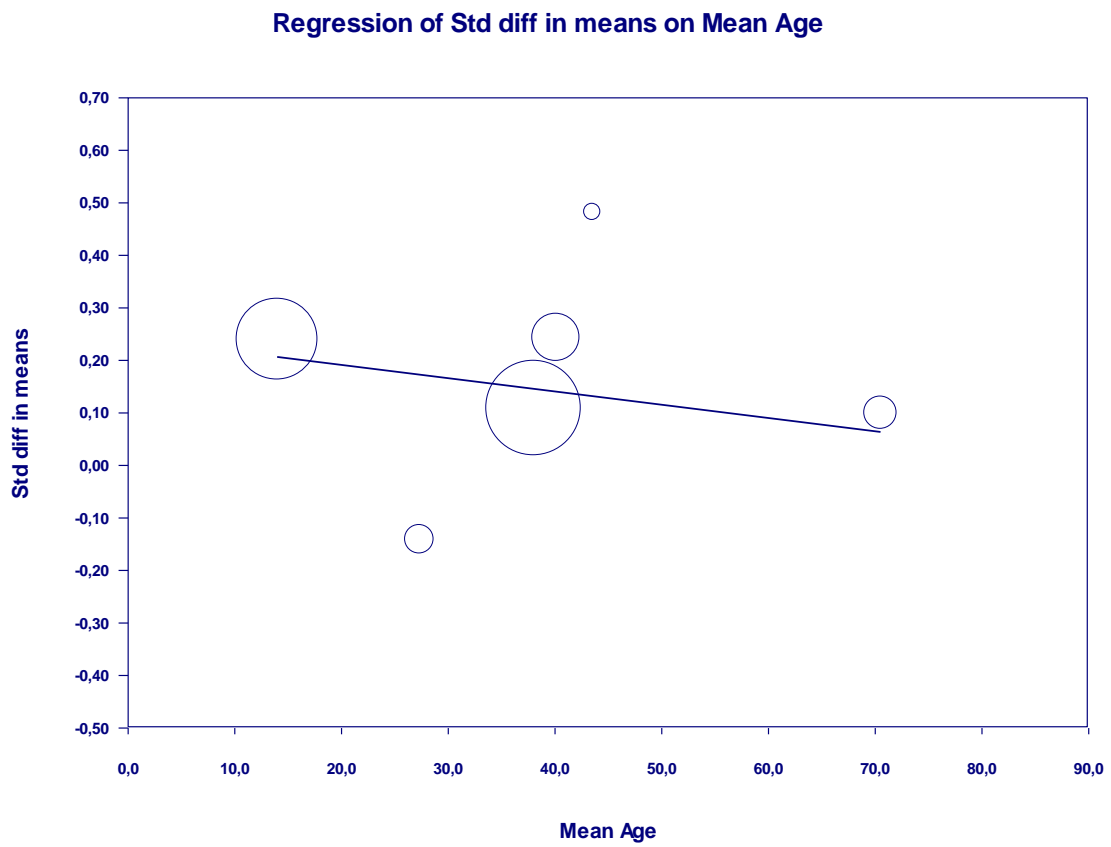



**eFigure 13.** Meta-regression Analysis of Working Memory: Seropositivity Cutoff

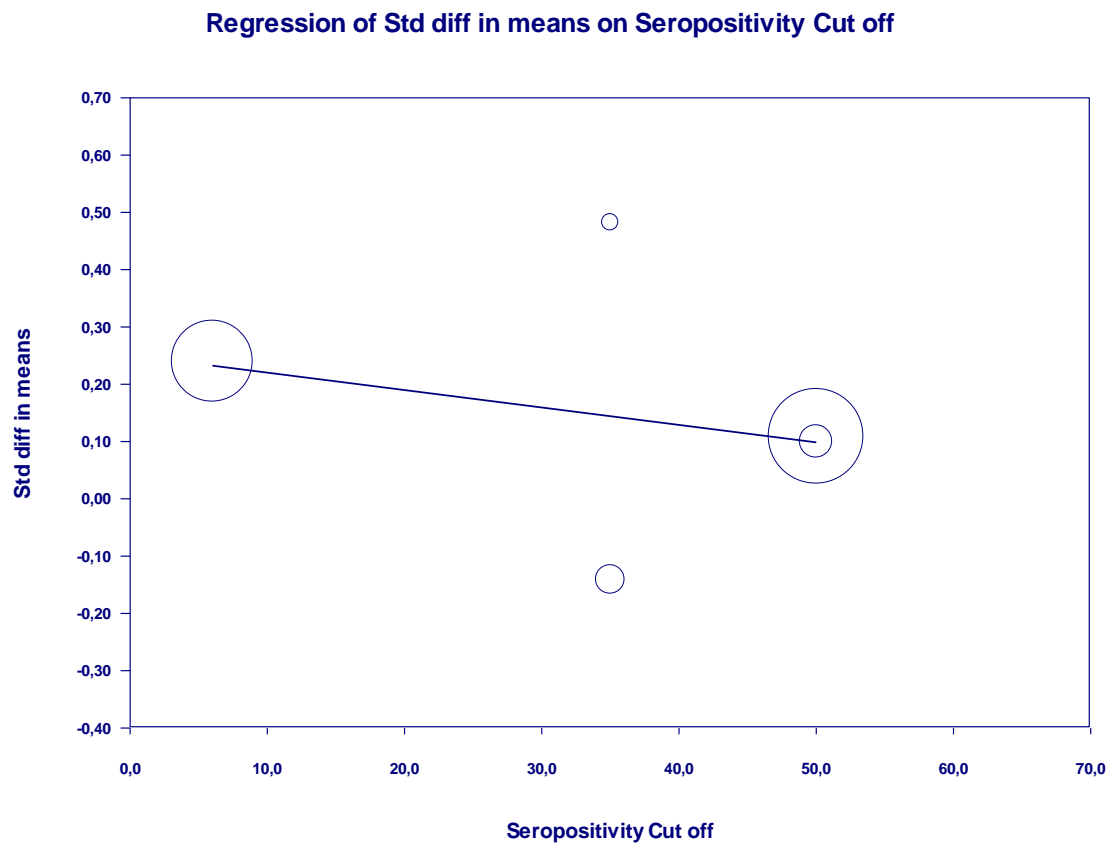

**eFigure 14.** Meta-regression Analysis of Short-term Verbal Memory: Mean Age

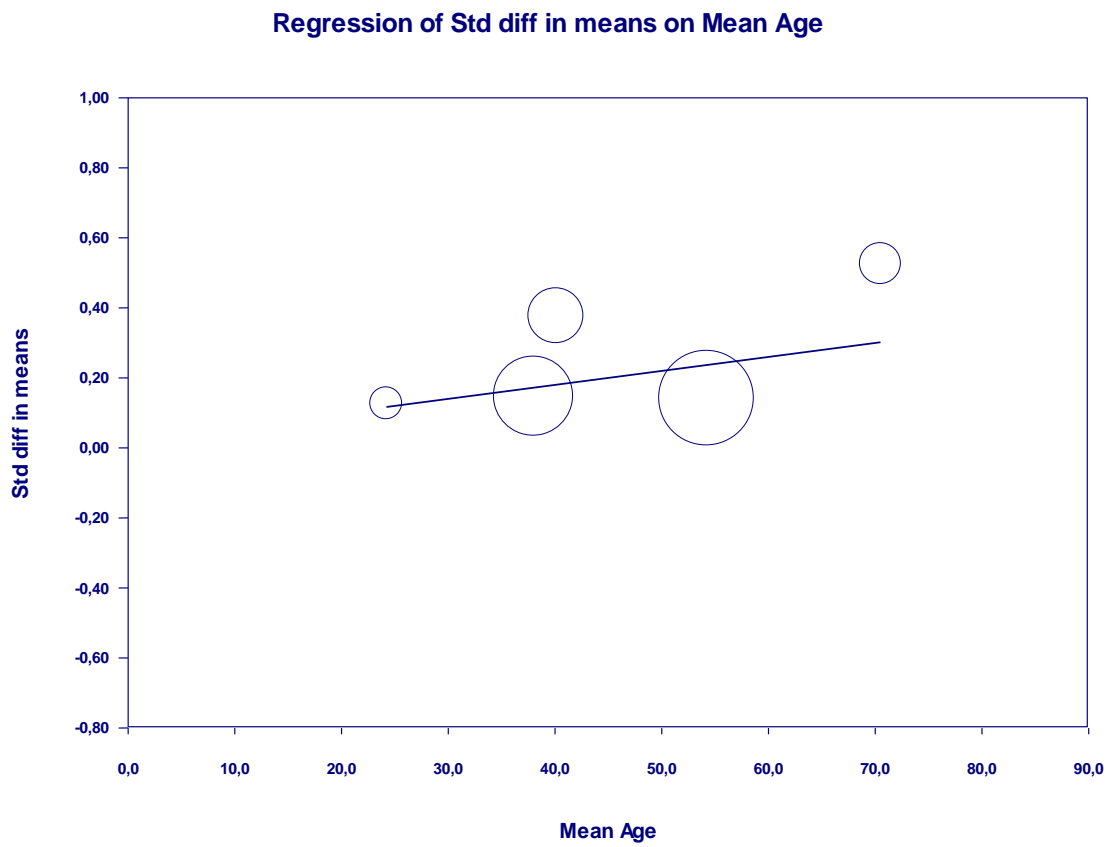

**eFigure 15.** Meta-regression Analysis of Executive Functioning: Mean Age

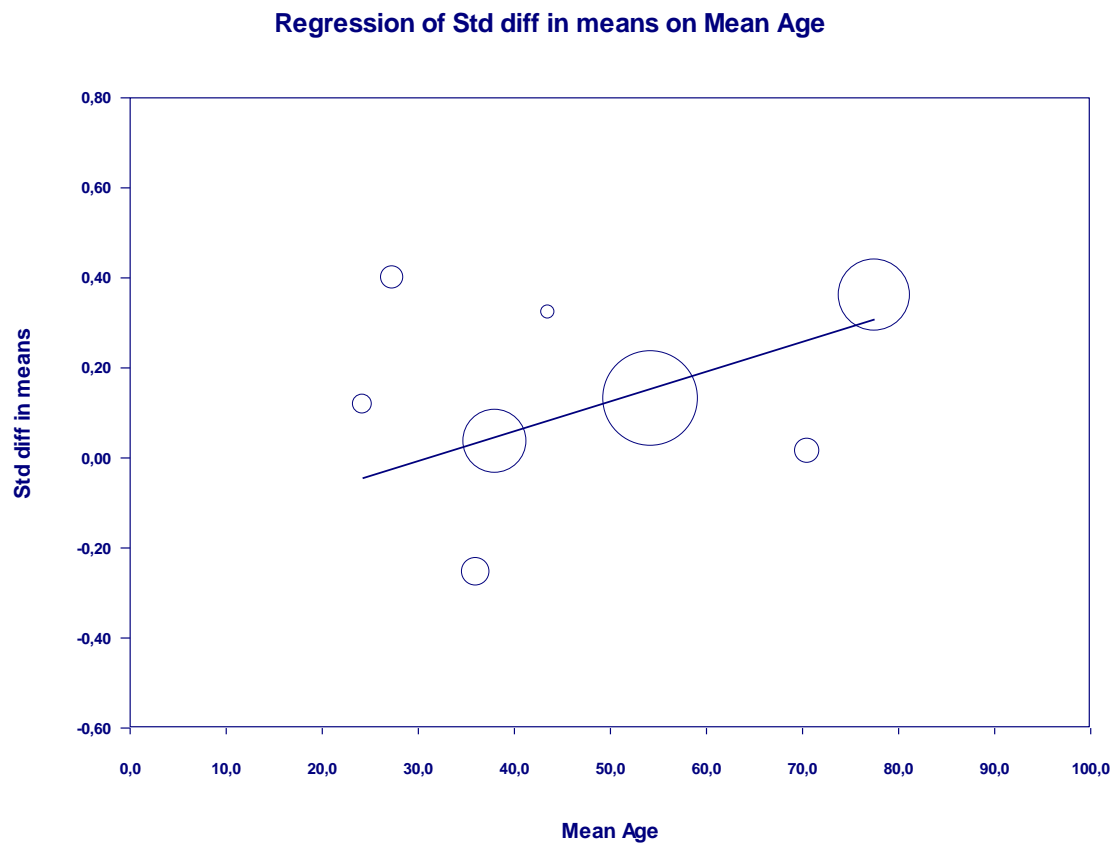

**eFigure 16.** Meta-regression Analysis of Executive Functioning: Study Quality

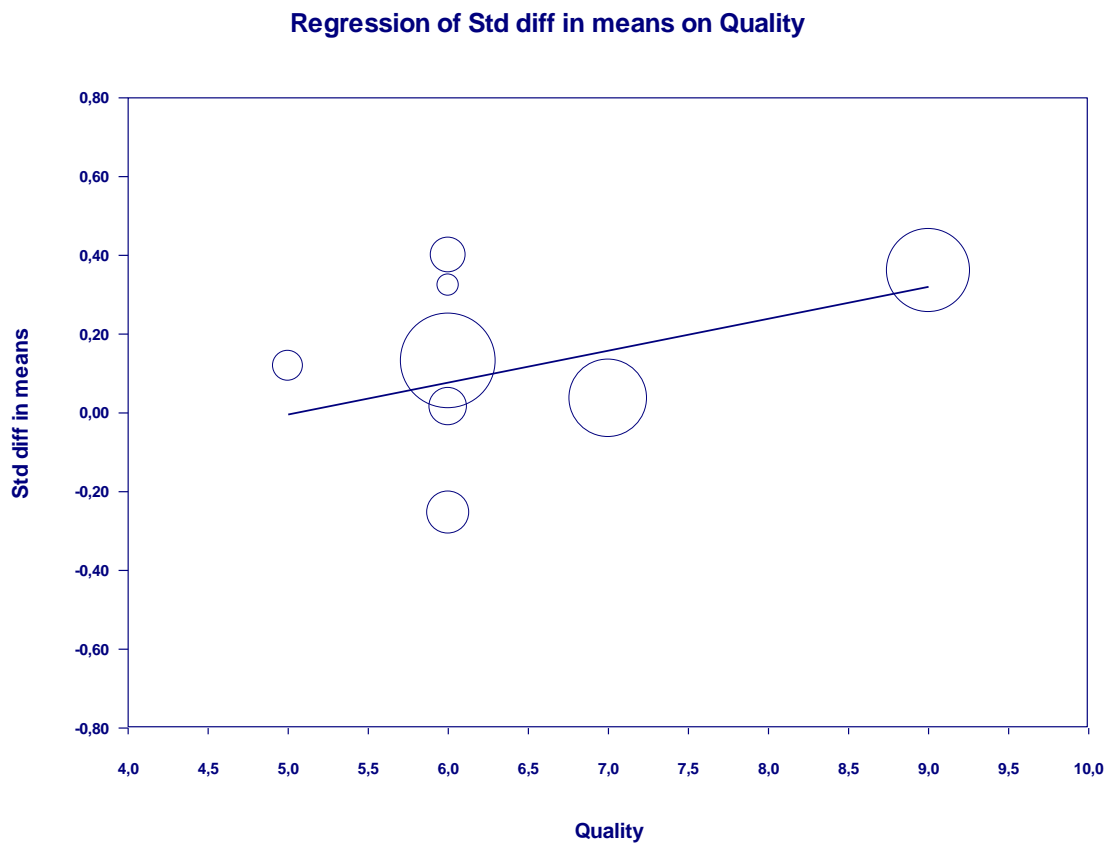

**eFigure 17.** Meta-regression Analysis of Executive Functioning: Seropositivity Cutoff

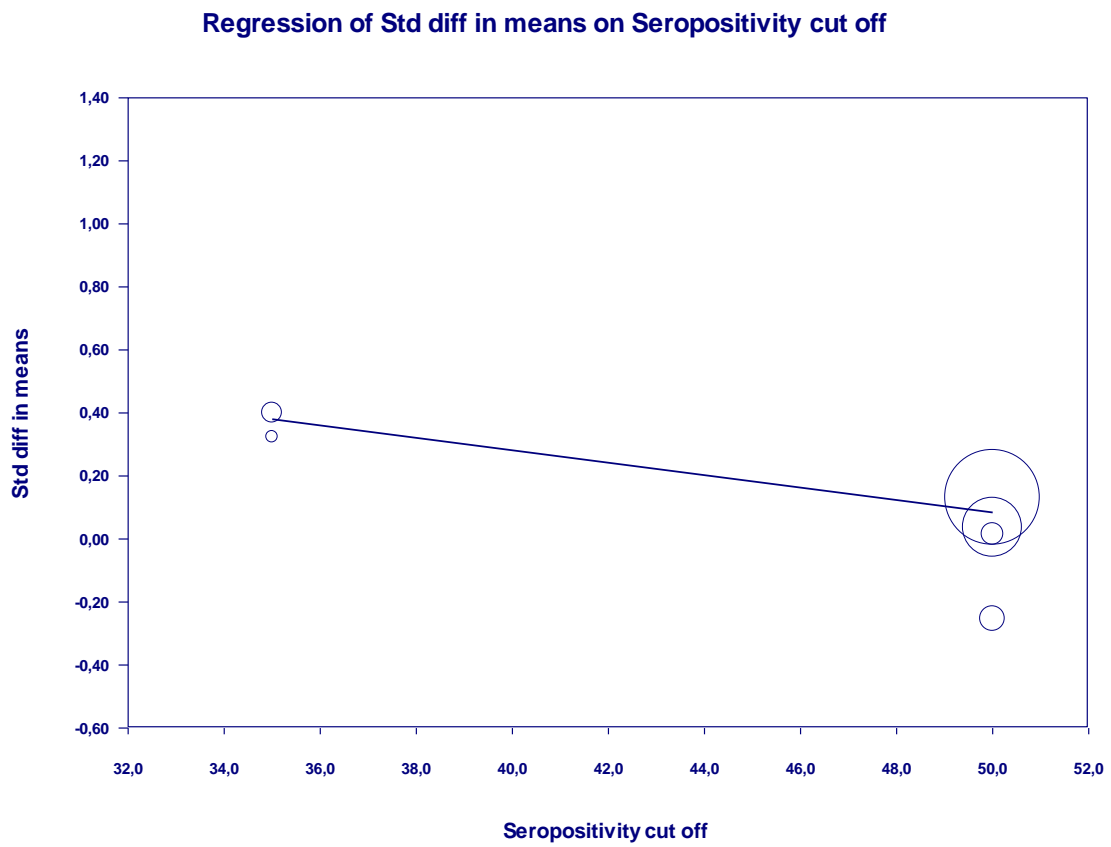

## eReferences

1. Strauss PPE, Strauss E, Sherman NAAPDPCNEMS, Sherman EMS, Spreen O. A Compendium of Neuropsychological Tests: Administration, Norms, and Commentary. *Oxford University Press*. 2006.
2. Lezak PNPMD, Lezak MD, Howieson APNPDB, Howieson DB, Loring PNDW, Hannay HJ, et al. Neuropsychological Assessment. *Oxford University Press*. 2004.
3. Nuechterlein KH, Green MF, Kern RS, Baade LE, Barch DM, Cohen JD, et al. The MATRICS Consensus Cognitive Battery, part 1: test selection, reliability, and validity. *Am J Psychiatry*. 2008;165(2):203-213.
4. Berrett AN, Gale SD, Erickson LD, Brown BL, Hedges DW. Toxoplasma Gondii moderates the association between multiple folate-cycle factors and cognitive function in U.S. adults. *Nutrients*. 2017;9(6):564.
5. Cobia D, Perry C, Gale S, et al. SA79. Toxoplasma Gondii Affects Posterior Association Cortex and Related Functions in Healthy, but Not Schizophrenia, Individuals. *Schizophr bull*. 2017;43(suppl 1):S141-S141(abstr).
6. El-Hadidy MA, Elemshaty W, Othman W. Could Infection Effect Cognitive Function in Schizophrenia?: One Egyptian Center Study. *AJP*. 2013;44(873):1-8.
7. Ene L, Marcotte TD, Umlauf A, et al. Latent toxoplasmosis is associated with neurocognitive impairment in young adults with and without chronic HIV infection. *Journal of Neuroimmunology*. 2016;299:1-7.
8. Gajewski PD, Falkenstein M, Hengstler JG, Golka K. Toxoplasma gondii impairs memory in infected seniors. *Brain Behav Immun*. 2014;36:193-9.
9. Guenter W, Bielinski M, Deptula A, et al. Does Toxoplasma gondii infection affect cognitive function? A case control study. *Folia parasitol*. 2012;59(2):93-8.
10. Hamdani N, Daban-Huard C, Godin O, et al. Effects of cumulative Herpesviridae and Toxoplasma gondii infections on cognitive function in healthy, bipolar, and schizophrenia subjects. *J Clin Psychiat*. 2017;78(1):e18-e27.
11. Mendy A, Vieira ER, Albatineh AN, Gasana J. Toxoplasma gondii seropositivity and cognitive functions in school- aged children. *Parasitology*. 2015;142(9):1221-7.
12. Nimgaonkar VL, Yolken RH, Wang T, et al. Temporal Cognitive Decline Associated With Exposure to Infectious Agents in a Population-based, Aging Cohort. *Alzheimer Dis Assoc Disord*. 2016;30(3):216-222.
13. Novotna M, Havlicek J, Smith AP, et al. Toxoplasma and reaction time: Role of toxoplasmosis in the origin, preservation and geographical distribution of Rh blood group polymorphism. *Parasitology*. 2008;135(11):1253-61.

14. Stock AK, Heintschel von Heinegg E, Kohling HL, Beste C. Latent *Toxoplasma gondii* infection leads to improved action control. *Brain Behav Immun*. 2014;37:103-8.
15. Sugden K, Moffitt TE, Pinto L, Poulton R, Williams BS, Caspi A. Is *Toxoplasma Gondii* Infection Related to Brain and Behavior Impairments in Humans? Evidence from a Population-Representative Birth Cohort. *PloS one*. 2016;11(2):e0148435.
16. Torniainen-Holm M, Suvisaari J, Lindgren M, Harkanen T, Dickerson F, Yolken RH. The lack of association between herpes simplex virus 1 or *Toxoplasma gondii* infection and cognitive decline in the general population: An 11-year follow-up study. *Brain Behav Immun*. 2019;76:159-64.
